# Supplementary material for: Oral Magnesium Supplementation for Treating Glucose Metabolism Parameters in People with or at Risk of Diabetes: A Systematic Review and Meta-Analysis of Double-Blind Randomized Controlled Trials
Source: MDPI journal article supplement (doi:10.3390/nu13114074), 2021-11-15
Supplement: s1 [file s1]

**Table S1.** Descriptive characteristics of the studies including diabetic people.

| Author (Year)                 | Country         | Glucose Metabolism Parameters         | Condition            | Study Design | Diabetic Treatment         | Daily Mg Dosage                                 | Follow-up (Weeks) | Jadad's Scale | Treated | Age (SD) | Females | BMI (SD) | Placebo | Age (SD) | Females | BMI (SD) |      |    |      |     |
|-------------------------------|-----------------|---------------------------------------|----------------------|--------------|----------------------------|-------------------------------------------------|-------------------|---------------|---------|----------|---------|----------|---------|----------|---------|----------|------|----|------|-----|
| Corica et al., 1994           | Italy           | FPG, HbA1c                            | Type 2 diabetes      | Parallel     | Diet and sulphonylureas    | Mg pidolate 4.5 g                               | 4                 | 3             | 26      | 63       | 5       | 15       | 17      | 61       | 3       | 10       |      |    |      |     |
| de Lourdes Lima et al., 1998  | Brazil          | FPG, HbA1c                            | Type 2 diabetes      | Parallel     | Oral agents                | Mg oxide 41,4 mmol                              | 4                 | 4             | 39      | 51.2     | 11      | 31       | 25.5    | 6.5      | 54      | 55.5     | 8.3  | 41 | 25.5 | 6.5 |
| de Valk et al., 1998          | The Netherlands | FPG, HbA1c                            | Type 2 diabetes      | Parallel     | Use of insulin             | 15 mmol Mg-aspartate-HCl                        | 12                | 4             | 25      | 63       | 8.2     | 9        | 28.7    | 2.7      | 25      | 62       | 7.3  | 13 | 27.1 | 2.7 |
| Eibl et al., 1995             | Norway          | HbA1c                                 | Type 2 diabetes      | Parallel     | Oral agents                | Mg citrate 30 mmol                              | 12                | 4             | 18      | 63       | 8       | 7        | 27.5    | 3.2      | 20      | 54       | 1.5  | 12 | 29.3 | 5   |
| Gullestad et al., 1994        | Norway          | FPG, HbA1c                            | Type 2 diabetes      | Parallel     | Mixed                      | Mg lactate-citrate 15 nmol                      | 16                | 4             | 29      |          |         |          | 25.4    | 3.7      | 25      |          |      |    | 25.3 | 4.1 |
| Hagg et al., 1999             | Sweden          | HbA1c                                 | Type 1 diabetes      | Parallel     | Insulin                    | Mg hydroxide 250 mg                             | 48                | 4             | 15      | 40.5     | 8.9     | 7        | 24.3    | 2.5      | 13      | 36.9     | 10.6 | 8  | 23.9 | 3.2 |
| Jamilian et al., 2017         | Iran            | FPG                                   | Gestational diabetes | Parallel     | Only diet                  | Mg oxide 250 mg                                 | 6                 | 5             | 20      | 27.8     | 3.4     | 20       | 26.1    | 1.9      | 20      | 27.1     | 4.9  | 20 | 27.4 | 3.2 |
| Navarrete-Cortes et al., 2014 | Mexico          | FPG, insulin, HbA1c, HOMA-IR          | Type 2 diabetes      | Crossover    | Oral agents                | Mg lactate 750 mg daily (=360 mg elementary Mg) | 12                | 5             | 56      | 52.8     | 8.4     | 36       | 30.6    | 5.7      | 56      | 52.8     | 8.4  | 36 | 30.5 | 5.8 |
| Paolisso et al., 1994         | Italy           | FPG, insulin                          | Type 2 diabetes      | Crossover    | Oral agents                | Mag 2.3 g                                       | 4                 | 4             | 8       | 67.3     | 4.8     | 4        | 30.5    | 2.5      | 8       | 67.3     | 4.8  | 4  | 30.5 | 2.5 |
| Purvis et al., 1994           | USA             | FPG                                   | Type 2 diabetes      | Crossover    | Oral agents                | Mg chloride 384 g/day                           | 6                 | 5             | 28      |          |         |          |         |          | 28      |          |      |    |      |     |
| Rodriguez-Moran et al., 2014  | Mexico          | FPG, HbA1c, insulin, HOMA-IR          | Type 2 diabetes      | Parallel     | N/A                        | Mg chloride 2.5 g                               | 16                | 5             | 32      | 59.7     | 8.3     |          | 27.6    | 9.1      | 31      | 54.1     | 9.6  |    | 28.6 | 4.2 |
| Sadeghian et al., 2019        | Iran            | FPG, HbA1c, insulin, HOMA-IR          | Type 2 diabetes      | Parallel     | Oral agents and/or insulin | Mg oxide 250 mg                                 | 12                | 5             | 40      | 41.2     | 8.8     | 27       | 31.2    | 5.5      | 40      | 42.8     | 8.4  | 26 | 30.9 | 4.4 |
| Solati et al., 2014           | Iran            | FPG, 2hOGTT, HbA1c, HOMA-IR, insulin, | Type 2 diabetes      | Parallel     | Metformin, glibenclamide   | MgSO4 (300 mg equivalent)                       | 12                | 5             | 25      | 46.7     | 9       | 18       | 26.2    | 2.9      | 22      | 50.2     | 6.93 | 16 | 26.9 | 5.2 |

|       |                                  |                            |                           |             |     |            |       |            |     |            |        |            |
|-------|----------------------------------|----------------------------|---------------------------|-------------|-----|------------|-------|------------|-----|------------|--------|------------|
| Total | 11: type 2; 1: type 1; pregnancy | 10: parallel; 3: crossover | Median = 12 (range: 4–48) | Media n = 4 | 361 | 50.6 ± 7.6 | 53.0% | 27.5 ± 4.4 | 359 | 49.9 ± 6.5 | 57.2 % | 27.6 ± 4.3 |
|-------|----------------------------------|----------------------------|---------------------------|-------------|-----|------------|-------|------------|-----|------------|--------|------------|

**Abbreviations:** BMI—body mass index; Mg—magnesium; PLC—placebo; SMD—standardized mean difference; FPG—fasting plasma glucose; OGTT—oral glucose tolerance test; HbA1c—glycosilated haemoglobin; HOMA-IR—homeostatic model assessment-insulin resistance; SD—standard deviation.

**Table S2.** Descriptive characteristics of the studies including people at higher risk of diabetes.

| Author (Year)                        | Country                | Glucose Metabolism<br>Endpoint Measures          | Condition                                                      | Study Design | Mg Daily Dosage                          | Follow-up<br>(Weeks) | Jadad's<br>Scale | Treated | Age (SD)  |      |     | Fe<br>mal<br>es |     | BMI (SD) | Pla<br>ceb<br>o | Age (SD) |     |      | Fe<br>mal<br>es |  | BMI<br>(SD) |
|--------------------------------------|------------------------|--------------------------------------------------|----------------------------------------------------------------|--------------|------------------------------------------|----------------------|------------------|---------|-----------|------|-----|-----------------|-----|----------|-----------------|----------|-----|------|-----------------|--|-------------|
| Alizadeh et al.,<br>2021             | Iran                   | FPG, insulin,<br>HOMA-IR                         | Policistic ovary<br>syndrome                                   | Parallel     | 250 mg Mg oxide                          | 8                    | 5                | 21      | 26.6      | 4.9  | 100 | 27.8            | 3.2 | 20       | 26.2            | 5.7      | 100 | 26.9 | 3.8             |  |             |
| Chacko et al.,<br>2011               | USA                    | Insulin, C-petide,<br>HbA1c, FPG                 | Overweight                                                     | Crossover    | 500 mg citrate Mg                        | 4                    | 5                | 13      | 47        | 13.8 | 4   | 28.3            | 4   | 13       | 41.9            | 12.<br>7 | 6   | 28.1 | 5.5             |  |             |
| Cunha et al., 2017                   | Brazil                 | FPG, insulin,<br>HOMA-IR                         | Overweight and<br>hypertension                                 | Parallel     | Chelate Mg 600 mg                        | 24                   | 4                | 17      | 54        | 7    | 17  | 29.7            | 4.1 | 18       | 57              | 5        | 18  | 26.8 | 3.9             |  |             |
| de Souza et al.,<br>2014             | Brazil                 | FPG, insulin,<br>HOMA-IR                         | Metabolic<br>syndrome                                          | Parallel     | Chelate Mg 400 mg                        | 12                   | 3                | 30      | 44.6      | 9.7  |     | 33.7            | 6.7 | 32       | 46.6            | 12.<br>3 |     | 34.9 | 6.1             |  |             |
| Farsinejad-Marj,<br>2021             | Iran                   | FPG, insulin,<br>HOMA-IR, QUICKI                 | Policistic ovary<br>syndrome                                   | Parallel     | 250 mg Mg<br>oxide                       | 8                    | 5                | 30      | 26.3      | 3.9  | 100 | 27.8            | 5.1 | 30       | 26.0            | 5.1      | 100 | 27.7 | 5.4             |  |             |
| Guerrero-Romero<br>et., 2015         | Mexico                 | Fasting insulin,<br>HOMA-IR, FPG,<br>2hOGTT      | Prediabetes and<br>hypomagnesemia                              | Parallel     | 30 mL of MgCl2 =<br>382 Mg equivalent    | 16                   | 5                | 59      | 42.2      | 9.5  |     | 30.6            | 6.4 | 57       | 42.3            | 8        |     | 31.7 | 4.7             |  |             |
| Joris et al., 2017                   | The<br>Netherla<br>nds | FPG, insulin,<br>HOMA-IR                         | Overweight                                                     | Parallel     | Mg citrate 350 mg                        | 24                   | 5                | 26      |           |      |     |                 |     | 26       |                 |          |     |      |                 |  |             |
| Lee et al., 2009                     | South<br>Korea         | FPG, insulin, HOMA-<br>IR                        | Overweight                                                     | Parallel     | 300 Mg Oxide                             | 12                   | 4                | 75      | 36.9      | 7.9  | 30  | 26.7            | 2.8 | 80       | 40.5            | 7.3      | 40  | 26.1 | 2.3             |  |             |
| Mooren et al.,<br>2011               | Germany                | FPG, 2h OGTT,<br>HOMA-IR, insulin,<br>2h insulin | Overweight                                                     | Parallel     | Mg aspartate-<br>hydrochloride 365<br>mg | 24                   | 3                | 25      | 30-<br>70 |      |     | 30.9            | 1.2 | 22       | 30-<br>70       |          |     | 30   | 2.3             |  |             |
| Rodriguez-<br>Moraan et al.,<br>2018 | Mexico                 | FPG                                              | Metabolic<br>syndrome                                          | Parallel     | 30 mL of MgCl2 =<br>382 Mg equivalent    | 16                   | 5                | 100     | 39.4      | 9.8  | 34  | 29.7            | 6.5 | 98       | 40.4            | 10.<br>6 | 35  | 30.5 | 5.9             |  |             |
| Simental-<br>Mendiaet al.,<br>2014   | Mexico                 | Fasting insulin,<br>HOMA-IR, FPG,<br>2hOGTT      | Metabolically<br>obese normal<br>weight                        | Parallel     | 30 mL of MgCl2 =<br>382 Mg equivalent    | 16                   | 5                | 24      | 31.9      |      |     | 22.4            | 1.6 | 23       | 39.5            |          |     | 22.7 | 1.9             |  |             |
| Toprak et al.,<br>2017               | Turkey                 | FPG, HbA1c,<br>HOMA-IR                           | Prediabetes,<br>chronic renal<br>failure and<br>hypomagnesemia | Parallel     | 365 mg Mg Oxide                          | 12                   | 5                | 57      | 55.6      | 13.8 |     | 33.9            | 2.8 | 61       | 57.1            | 12.<br>9 |     | 34.0 | 2.6             |  |             |

|       |                                                                                                                                                        |                               |                                               |     |                |         |            |     |                |         |            |
|-------|--------------------------------------------------------------------------------------------------------------------------------------------------------|-------------------------------|-----------------------------------------------|-----|----------------|---------|------------|-----|----------------|---------|------------|
| Total | 5: overweight;<br>2:metabolic<br>syndrome; 2:<br>prediabetes; 2:<br>polycystic<br>metabolic<br>syndrome; 1:<br>metabolically<br>obese normal<br>weight | 11: parallel; 1:<br>crossover | Median = 14<br>(range: 4–24)    Median<br>= 5 | 477 | 42.5 ±<br>10.2 | 42<br>% | 28.8 ± 3.8 | 480 | 45.6 ±<br>10.0 | 50<br>% | 28.9 ± 3.8 |
|-------|--------------------------------------------------------------------------------------------------------------------------------------------------------|-------------------------------|-----------------------------------------------|-----|----------------|---------|------------|-----|----------------|---------|------------|

**Abbreviations:** BMI—body mass index; Mg—magnesium; PLC—placebo; SMD—standardized mean difference; FPG—fasting plasma glucose; OGTT—oral glucose tolerance test; HbA1c—glycosilated haemoglobin; HOMA-IR—homeostatic model assessment-insulin resistance; SD—standard deviation.

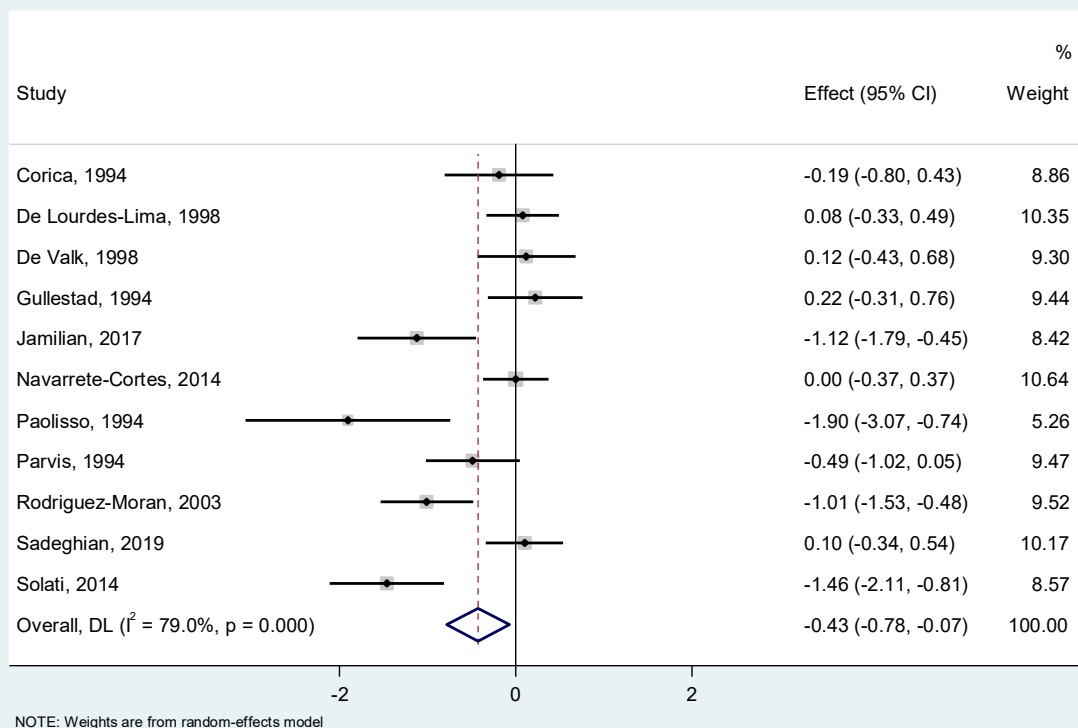

**Figure S1.** Forrest plots of significant results with oral Mg supplementation vs. placebo in improving fasting plasma glucose in diabetes.

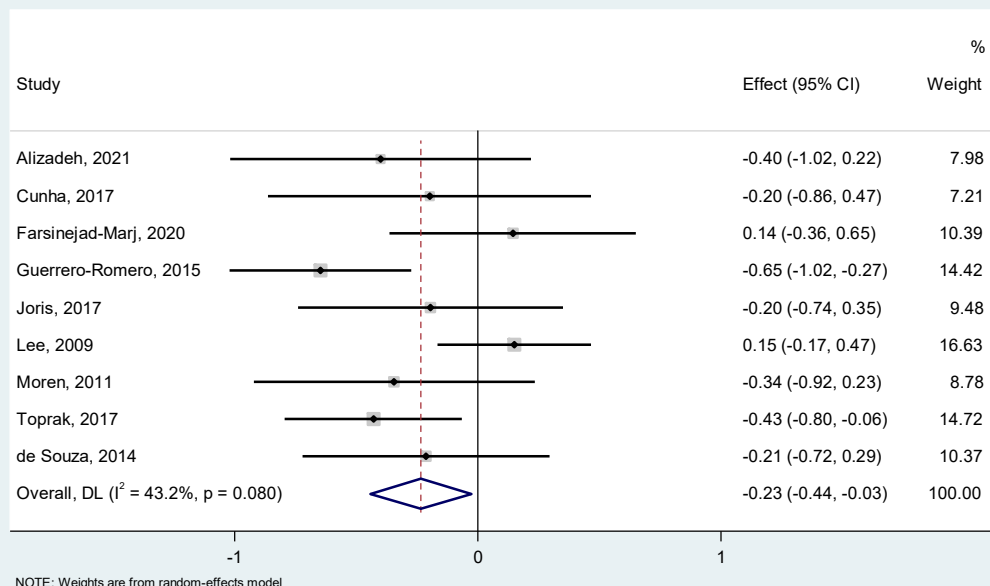

**Figure S2.** Forrest plots of significant results with oral Mg supplementation vs. placebo in improving fasting plasma glucose in people at high risk of diabetes.

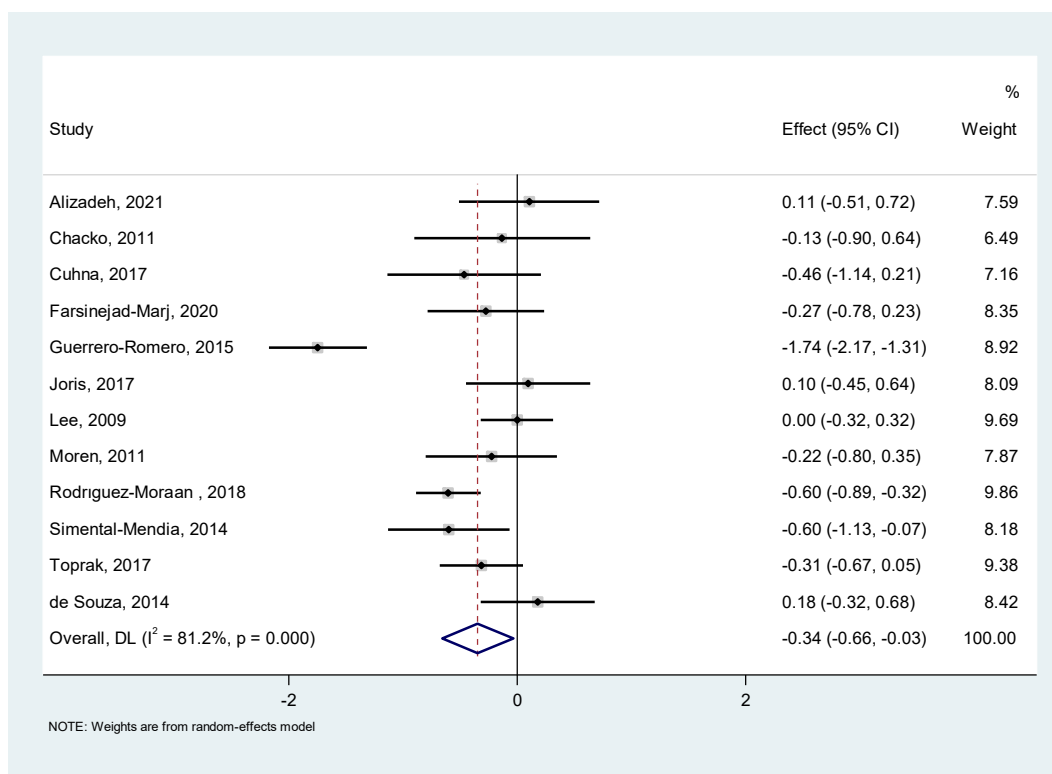

**Figure S3.** Forrest plots of significant results with oral Mg supplementation vs. placebo in improving HOMA-IR in people at high risk of diabetes.
